1 **Root type and soil phosphate determine the taxonomic landscape of colonizing**  
2 **fungi and the transcriptome of field-grown maize roots**

3 Running title: Maize root transcriptome and fungal endophyte diversity

4

5 Peng Yu<sup>1,2,#</sup>, Chao Wang<sup>1,4,#</sup>, Jutta A. Baldauf<sup>2</sup>, Huanhuan Tai<sup>2,5</sup>, Caroline Gutjahr<sup>3,6\*</sup>,  
6 Frank Hochholdinger<sup>2,\*</sup>, Chunjian Li<sup>1,\*</sup>

7

8 <sup>1</sup> China Agricultural University, College of Resources and Environmental Science,  
9 Department of Plant Nutrition, 100193 Beijing, China

10 <sup>2</sup> University of Bonn, Institute of Crop Science and Resource Conservation (INRES),  
11 Crop Functional Genomics, 53113 Bonn, Germany

12 <sup>3</sup> LMU Munich, Faculty of Biology, Genetics, 82152 Munich, Germany

13 <sup>4</sup> Chinese Academy of Sciences, Institute of Genetics and Developmental Biology,  
14 State Key Laboratory of Plant Genomics, 100101 Beijing, China

15 <sup>5</sup> University of Cologne, Botanical Institute, Cluster of Excellence on Plant Sciences  
16 (CEPLAS), Cologne Biocenter, 50674 Cologne, Germany

17 <sup>6</sup> TU Munich, School of Life Science Weihenstephan, Plant Genetics, 85354 Cologne,  
18 Germany

19

20

21 \* Correspondence:

22 [hochholdinger@uni-bonn.de](mailto:hochholdinger@uni-bonn.de)

23 [lichj@cau.edu.cn](mailto:lichj@cau.edu.cn)

24 [caroline.gutjahr@lmu.de](mailto:caroline.gutjahr@lmu.de), [caroline.gutjahr@tum.de](mailto:caroline.gutjahr@tum.de)

25 # Co-first authors

26

27 **Key finding:** Our data illustrates for the first time that root type identity and  
28 phosphate availability determine the community composition of colonizing fungi and  
29 shape the transcriptomic response of the maize root system.

30

31    Figures: 6; Supplementary figures: 5; Supplementary tables: 11

32

33 **Summary**

- 34 • Plant root systems consist of different root types colonized by a myriad of soil  
35 microorganisms including fungi, which influence plant health and  
36 performance. The distinct functional and metabolic characteristics of these  
37 root types may influence root type inhabiting fungal communities.
- 38 • We performed internal transcribed spacer (ITS) DNA profiling to determine  
39 the composition of fungal communities in field-grown axial and lateral roots  
40 of maize (*Zea mays* L.) and in response to two different soil phosphate (P)  
41 regimes. In parallel, these root types were subjected to transcriptome profiling  
42 by RNA-Seq.
- 43 • We demonstrated that fungal communities were influenced by soil P levels in a  
44 root type-specific manner. Moreover, maize transcriptome sequencing  
45 revealed root type-specific shifts in cell wall metabolism and defense gene  
46 expression in response to high phosphate. Furthermore, lateral roots  
47 specifically accumulated defense related transcripts at high P levels. This  
48 observation was correlated with a shift in fungal community composition  
49 including a reduction of colonization by arbuscular mycorrhiza fungi as  
50 observed in ITS sequence data and microscopic evaluation of root colonization.
- 51 • Our findings point towards a diversity of functional niches within root systems,  
52 which dynamically change in response to soil nutrients. Our study provides  
53 new insights for understanding root-microbiota interactions of individual root  
54 types to environmental stimuli aiming to improve plant growth and fitness.

55

56 **Key words:** axial root, fungal diversity, lateral root, maize, phosphate, transcriptome

57

58

## 59 **Introduction**

60 Land plants host a wide variety of root-inhabiting microbes (Bulgarelli *et al.*, 2013).  
61 These microorganisms substantially support their host plants in the acquisition of soil  
62 nutrients (Smith & Smith, 2011). Moreover, the microbiota contributes to plant health  
63 by suppressing pathogens or enhancing disease resistance (Mendes *et al.*, 2011;  
64 Berendsen *et al.*, 2012). Studies in *Arabidopsis*, rice and maize have shown that the  
65 taxonomic composition of the root inhabiting microbiota are strongly influenced by  
66 geography and soil types (Bulgarelli *et al.*, 2012; Lundberg *et al.*, 2012; Edwards *et al.*  
67 *et al.*, 2015), but also by the plant genotype (Aira *et al.*, 2010; Bouffaud *et al.*, 2012;  
68 Bulgarelli *et al.* 2012; Edwards *et al.*, 2015). Thus, it is possible that plants attract  
69 microbes, which are most beneficial to them under a given environmental condition.

70 Maize is one of the most important cereal crops (Gore *et al.*, 2009). Its complex root  
71 architecture and morphology is substantially influenced by environmental variation of  
72 soil conditions (Yu *et al.*, 2016a). In cereal crops, highly branched root systems are  
73 composed of multiple root types formed at different developmental stages under the  
74 control of distinct genes (Tai *et al.*, 2016). Axial roots generally function in conferring  
75 anchorage to the soil while the finer, soil-exploring lateral roots are mainly involved  
76 in foraging nutrients and water resources (Coudert *et al.*, 2010; Rogers & Benfey,  
77 2015; Yu *et al.*, 2016a). The observed “job sharing” among root types within a root  
78 system implies root type-specific molecular and physiological responses to biotic and  
79 abiotic stimuli. In fact, recent root type-specific transcriptomic and lateral root  
80 branching responses to local high nitrate have been described in maize (Yu *et al.*,  
81 2015, 2016b). Moreover, the colonization of root systems by soil microbes such as  
82 arbuscular mycorrhiza fungi (AMF) is uneven among root types. This has been well  
83 described in rice, in which large lateral roots are strongly colonized, whereas crown  
84 roots are only slightly colonized and fine lateral roots are not colonized (Gutjahr *et al.*,  
85 2009; Gutjahr & Paszkowski, 2013; Fiorilli *et al.* 2015). These differences are  
86 mirrored by distinct transcriptional profiles among rice root types during AM  
87 symbiosis, suggesting potential relationships between root colonization, architectural  
88 variations and functional switches within the root system (Gutjahr *et al.*, 2015).

89 Phosphorus (P) is one of the most limiting resources in natural soils and its  
90 availability is critical for crop productivity. Plant roots can absorb only inorganic

91 orthophosphate (Pi), although P is abundant in many natural soil types both as organic  
92 and inorganic pools (Marschner *et al.*, 2011). Plants have evolved molecular systems  
93 that can sense and respond to P starvation and adjust root and shoot growth  
94 accordingly (Poirier & Bucher, 2002). In addition, as a mechanism to adjust internal  
95 phosphate homeostasis, roots are associated with bacteria and fungi, which can  
96 mobilize inorganic P in soils inaccessible for plants such as hydroxyapatite and  
97  $\text{Ca}_3(\text{PO}_4)_2$  by conversion into bioavailable P (Smith & Read, 2008). AMF of the  
98 phylum Glomeromycota are the best-characterized beneficial fungi associated with  
99 plant roots. They colonize 80%-90% of terrestrial plants and take up soil nutrients,  
100 including poorly mobile P, via an extended extraradical hyphal network (Bonfante &  
101 Genre, 2010; Smith & Smith, 2011; Gutjahr & Paszkowski, 2013). These nutrients are  
102 then transported into the root and released at highly branched hyphal structures, the  
103 arbuscules, which form inside root cortical cells (Smith & Smith, 2011; Gutjahr &  
104 Parniske, 2013). Besides AMF, roots are also inhabited by fungi from other phyla  
105 such as Ascomycota, Zygomycota and Basidiomycota. Some members of these fungal  
106 clades form ectomycorrhizas with woody plants (Vrålstad, 2004; Smith *et al.*, 2007)  
107 and others live in roots or in the rhizosphere as endophytes or pathogens (Ambardar *et*  
108 *al.*, 2016). Less is known about non-AMF fungal communities in roots and  
109 rhizospheres, although several studies cataloging the root and rhizosphere bacterial  
110 microbiome or AMF communities have been conducted.

111 High-throughput sequencing technologies have facilitated systemic surveys of root-  
112 associated microbiomes and interactions with their habitats (Ofek-Lalzar *et al.*, 2014).  
113 Recently root type-specific regulation of root system architecture has been surveyed  
114 at the transcriptional level (Gutjahr *et al.*, 2015; Yu *et al.*, 2016b). However,  
115 interaction between transcriptome changes and the interior fungal community within  
116 the root types remains poorly described, especially under realistic field conditions. In  
117 this study, taxonomic identification of fungal communities inhabiting different root  
118 types by ITS DNA amplicon sequencing was combined with transcriptome analyses  
119 of these root types by RNA sequencing (RNA-Seq). The results highlight root type-  
120 specific fungal taxonomic compositions and transcriptome profiles in response to  
121 divergent P regimes. Our findings point towards a diversity of niches within the root  
122 system, which dynamically change in response to environmental factors such as soil  
123 nutrients.



## 125 **Materials and Methods**

### 126 **Experimental design and sample collections in the field**

127 Hybrid maize of the genotype ZD958 (a modern variety widely used in China) was  
128 planted in four biological replicate plots in the field under high (150 kg ha<sup>-1</sup>) and low  
129 (0 kg ha<sup>-1</sup>) phosphate conditions at the long-term experimental station of China  
130 Agricultural University (40°8'20"N, 116°10'047"E) in 2015. The design of this long  
131 term experiment is as follows: in total eight phosphate levels are tested and each  
132 phosphate level is represented by four independent blocks. The 32 blocks are  
133 randomly distributed across the field. In our experiment, we selected one low and one  
134 high phosphate condition. We collected each of the four biological replicates of root  
135 and soil samples for the two soil phosphate levels from a different block. The different  
136 blocks per treatment are spatially separated from each other by blocks, which were  
137 subjected to different phosphate treatments. This long term experiment and the block  
138 design is described in detail in Deng *et al.* (2014) and Wang *et al.* (2017). The soil  
139 type at the study site is a calcareous alluvial soil with a silt loam texture (FAO) typical  
140 of the north region of China. The top 30 cm soil from each independent block were  
141 pooled and mixed to determine soil chemical properties prior to sowing. The chemical  
142 properties of these soils are listed in Table S1. The maize seeds were sown on  
143 6/5/2015 and samples for subsequent analyses were collected on 7/25/2015. The exact  
144 amounts of essential chemical fertilizers for the two phosphate treatments (low  
145 phosphate and high phosphate) were weighed and applied separately at each  
146 application date and are provided in Table S2. The average monthly rainfall across the  
147 whole field was recorded until sample collections by a small meteorological station  
148 located in the experimental field listed in Table S3.

149 For fungal community analyses under each phosphate condition samples of bulk soil,  
150 axial roots and lateral roots were taken at the flowering stage (Fig. 1a). After shoot  
151 excision, all mature axial roots with emerged lateral roots of two neighboring plants  
152 from the top 30 cm soil for each independent block were vigorously washed with  
153 sterilized deionized water in order to remove all soil from the root surface. The  
154 washing steps were repeated twice to avoid soil contamination in the root type  
155 samples. Subsequently the root system was separated into axial and lateral root

156 samples with sterilized scissors. Axial roots without lateral roots and newly emerged  
157 axial roots were excluded from our study to minimize developmental variability  
158 within the pool of roots (Gutjahr *et al.*, 2015). Separated axial and lateral root samples  
159 were gently dried with clean soft tissue and immediately frozen in liquid nitrogen and  
160 stored at -80 °C for downstream microbiome and transcriptome analysis. The top 30  
161 cm soil layer at the unplanted plots was crushed and sieved through a 2 mm mesh in  
162 the field. This mixed fresh soil was referred to as the bulk soil samples and stored at -  
163 20 °C for subsequent short amplicon sequencing analyses. Shoot biomass and P  
164 content of maize plants with low or high P input were determined using a modified  
165 Kjeldahl digestion and vanado-molybdate method by automated colorimetry  
166 according to Peng *et al.* 2012 (Table S4).

167

#### 168 **Short amplicon sequencing experiments for root types and bulk soils**

169 Extraction of genomic DNA

170 Total genomic DNA was extracted from ground root tissues of the two root types and  
171 from bulk soil with the FastDNA® SPIN Kit (MP Biomedicals, Solon, USA)  
172 following the manufacturer's instructions. DNA concentration and purity was  
173 estimated on 1% agarose gels. Subsequently, DNA was diluted to 1ng/μl with sterile  
174 water.

175 Amplicon generation

176 Fungal diversity was characterized by sequencing ITS sequences amplified by PCR  
177 from bulk soil, axial root and lateral root DNA extracts. Briefly, fungal ITS1 loci were  
178 amplified with primers ITS5-1737F (5'-GGAAGTAAAAGTCGTAACAAGG-3') and  
179 ITS2-2043R (5'-GCTGCGTTCTTCATCGATGC-3'), which are universal DNA  
180 barcode marker for fungi (Schoch *et al.*, 2012) and widely used for species  
181 identification for soil fungal community (Tedersoo *et al.*, 2010; Lu *et al.*, 2013).  
182 These specific primers (New England Biolabs) included a barcode and adaptor for  
183 annealing to the Illumina flow cell. All pooled triplicate PCR reactions were carried  
184 out in a 30 μl volume with 15 μl of Phusion® High-Fidelity PCR Master Mix (New  
185 England Biolabs), 0.2 μmol of forward and reverse primers, and about 10 ng template



186 DNA. Thermal cycling included an initial denaturation step at 98 °C for 1 min,  
187 followed by 30 cycles of denaturation at 98 °C for 10 s, annealing at 50 °C for 30 s,  
188 and elongation at 72 °C for 30 s and a final step of 72°C for 5 min.

189 PCR product quantification, quality control and purification

190 PCR products were separated on a 2% agarose gel and visualized with SYBR green.  
191 Eighteen DNA samples with bands of a size between 400-450 bp were chosen for  
192 further experiments. PCR products of eighteen samples were mixed in equidense  
193 ratios. Mixed PCR products were purified with the GeneJET Gel Extraction Kit  
194 (Thermo Scientific).

195 Library preparation and sequencing

196 Sequencing libraries were generated using NEB Next Ultra DNA Library Prep Kit  
197 from Illumina (NEB, USA) following the manufacturer's instructions including the  
198 addition of index codes. Library quality was assessed on the Qubit 2.0 Fluorometer  
199 (Thermo Scientific) and High-Sensitivity DNA chip (Agilent Bioanalyzer). Finally,  
200 the library was sequenced on an Illumina HiSeq 2000 platform and 250 bp paired-end  
201 reads were generated.

## 202 **Data analysis of short amplicon sequencing**

203 Raw Illumina fastq files were demultiplexed, quality filtered and analyzed using a  
204 custom Perl script by QIIME v1.7.0 (Caporaso *et al.*, 2010; Dataset S1). Paired-end  
205 reads of the original DNA fragments were merged into raw tags by using FLASH  
206 (Magoč & Salzberg, 2011) and then assigned to each sample according to the unique  
207 barcodes. Quality filtering on the raw tags was performed under specific filtering  
208 conditions to obtain the high-quality clean tags using QIIME v1.7.0 (Bokulich *et al.*,  
209 2013). In-house Perl scripts were used to analyze alpha- (within samples) and beta-  
210 (among samples) diversity. First, reads were filtered by QIIME quality filters. Then  
211 `pick_de_novo_otus.py` was used to pick OTUs to generate an OTU table. Sequences  
212 with  $\geq 97\%$  similarity were assigned to the same OTUs using UCLUST. We picked a  
213 representative sequence for each OTU and used the Unite Database (Kõljalg *et al.*,  
214 2013) to annotate taxonomic information base on Blast algorithm which was

215 calculated by QIIME software. OTU relative abundances were calculated by dividing  
216 the absolute abundances by the total sequence count per sample analyzed. In order to  
217 compute alpha diversity, we rarified the OTU table and calculated three metrics:  
218 Chao1 is estimated as the species abundance. Observed species are estimated as the  
219 amount of unique OTUs and the Shannon index is estimated as the diversity found in  
220 each sample. Rarefaction curve was generated based on the chao1 metric.  
221 Multidimensional scaling was performed to visualize the sample relations based on  
222 the Bray-Curtis similarity matrix using the plotMDS function of the Bioconductor  
223 package limma (Smyth, 2005) in R.  
224 Beta diversity was calculated based on unweighted UniFrac distance by QIIME  
225 software. Unweighted pair group method with arithmetic mean (UPGMA) clustering  
226 was performed as a type of hierarchical clustering method to interpret the unweighted  
227 UniFrac distance matrix using average linkage by QIIME. Tukey's post-hoc tests and  
228 Student's *t*-tests were conducted to determine the fungal diversity of the different root  
229 types at a given phosphate condition. Relative abundance of fungal taxa among root  
230 type and soil samples were determined and statistical analyses were based on FDR-  
231 corrected Kruskal-Wallis test ( $P < 0.05$ ).

### 232 **Assays for arbuscular mycorrhizal fungi colonization of root types**

233 Representative axial and 1<sup>st</sup> and 2<sup>nd</sup> order lateral roots selected from the root samples  
234 collected at 0-30 cm soil depth at flowering stage were stained with nonvital Trypan  
235 Blue (Shanghai Urchem Ltd, China) according to Phillips & Hayman (1970). Stained  
236 roots were studied under a microscope and the intensity of root cortex colonization by  
237 AMF was determined as described by Trouvelot *et al.* (1986). The arbuscular  
238 mycorrhizal colonization frequency represents the occurrence intensity of the sum of  
239 all AMF structures in the root samples. Arbuscule abundance denotes the arbuscule  
240 density within colonized root areas.

### 241 **Transcriptome profiling of maize root types**

242 Extraction of total RNA, cDNA library construction and RNA-Seq

243 For each of the two root types and two P conditions frozen samples of the axial and

244 lateral roots were ground in liquid nitrogen in four biological replicates resulting in a  
245 total of sixteen samples. RNA was extracted by the RNeasy Plus Universal Mini Kit  
246 (Qiagen). RNA quality was assessed by agarose gel electrophoresis and by an Agilent  
247 RNA 6000 Nano LabChip on an Agilent 2100 Bioanalyzer (Agilent Technologies).  
248 All RNA samples had an excellent quality as documented by RIN values from 7.6 to  
249 8.9 (Fig. S1). During the quality control steps, an Agilent DNA 1000 LabChip  
250 (Agilent Technologies) and an ABI StepOne Plus Real-Time PCR System (Applied  
251 Biosystems) were used for quantification and quality control of the sample libraries.  
252 The cDNA libraries for RNA-Seq were constructed with the TruSeq RNA Sample  
253 Prep Kit (Illumina). For sequencing, sixteen libraries for two root types under two P  
254 levels were evenly distributed into two lanes of a flow cell. Cluster preparation and  
255 paired-end read sequencing were performed according to the HiSeq 2000 guidelines  
256 (Illumina).

#### 257 Data processing and analysis

258 Processing, trimming, mapping of raw RNA-Seq reads were performed by CLC  
259 Genomics Workbench as previously described (Yu *et al.*, 2015; Dataset S2). Only  
260 genes that were represented by a minimum of five mapped reads in all four replicates  
261 of at least one root type were declared expressed and considered for downstream  
262 analyses. The raw sequencing reads were normalized by sequencing depth and were  
263  $\log_2$ -transformed to meet the assumptions of a linear model. Multidimensional scaling  
264 analysis and statistical procedures for analyzing differentially expressed genes  
265 between axial and lateral roots in combination with two P conditions were performed  
266 using the Bioconductor package *limma* (Smyth, 2004, 2005) in R (R version 3.1.1  
267 2014-07-10, *limma\_3.20.9*) according to Yu *et al.*, 2016b. The resulting *P*-values of  
268 the pairwise *t*-tests were used to determine the total number of differentially expressed  
269 genes for each comparison by controlling the FDR <0.05 to adjust for multiple testing  
270 (Benjamini & Hochberg, 1995).

#### 271 Functional annotation and associated network analysis

272 MapMan software (Thimm *et al.*, 2004) was used to assign and subsequently visualize  
273 differentially expressed genes to metabolic pathways based on the functional  
274 annotation file *ZmB73\_5b\_FGS\_cds\_2012*. Chi-Square and Fisher's exact tests were  
275 used to determine if the observed number of genes in each of the 35 major MapMan

276 categories significantly deviated from the expected distribution of all expressed genes  
277 (Marcon *et al.*, 2015). Association networks of the identified genes significantly  
278 enriched in MapMan categories were constructed with the aid of the online analysis  
279 tool STRING v10 (Szklarczyk *et al.*, 2015) and functional connections between each  
280 pair of interconnected genes were determined at a high confidence of  $>0.7$  (Yu *et al.*,  
281 2016b). Statistical analyses of functional enrichments in the network were further  
282 determined by KEGG (Kyoto Encyclopedia of Genes and Genomes) pathways  
283 (Kanehisa *et al.*, 2011) to identify significant biological processes.

#### 284 **Data availability**

285 Raw plant RNA-Seq data and fungal ITS sequencing data were deposited at the  
286 Sequence Read Archive (<http://www.ncbi.nlm.nih.gov/sra>) under accession numbers  
287 SRP095256 and SRP092319, respectively.

288

289 **Results**

290 **Global patterns of root type-specific fungal communities and transcriptomes**  
291 **under diverse P conditions**

292 The root system of maize consists of a variety of axial roots including primary,  
293 seminal and shoot-borne roots. All of these root-types form lateral roots. We  
294 examined the differences in fungal community composition between axial and lateral  
295 roots grown in the field under low P (LP) and high P (HP) conditions and correlated  
296 the fungal community composition with the corresponding maize root transcriptomes.  
297 Moreover, bulk soils with the two P levels were collected (Fig. 1a) for determination  
298 of free living soil fungi. Overall, fungal taxonomic structure varied across root types  
299 and P conditions, but replicate samples clustered closely together (Fig. 1b, Dataset S1).  
300 Moreover, the fungal taxonomic composition of bulk soils varied strongly between  
301 the two P levels and was very different from the fungal taxonomic composition  
302 associated with specific root types (Figs. 1b, S2).

303 In parallel, the transcriptomes of the axial and lateral roots were determined by RNA-  
304 Seq to survey gene expression in the two root types under two P levels (Datasets S2,  
305 3). In total, 27,375 genes were expressed in at least one root type/P treatment variant  
306 (Dataset S3). A multi-dimensional scaling plot showed the distances between  
307 transcript populations of root types and P levels (Fig. 1c). It highlighted that replicate  
308 root type by P regime samples clustered together and that transcriptomic differences  
309 were more divergent among root types than among P treatments.

310 **Fungal taxonomic composition differs among maize root types under diverse P**  
311 **conditions**

312 We identified in total 587 OTUs (operational taxonomic units), defined as general  
313 units of microbial taxonomic classifications under LP and 458 OTUs under HP  
314 conditions in bulk soil, axial and lateral root samples (Fig. 2a). The relative  
315 abundance of enriched fungal OTUs and taxonomic information are listed in Dataset  
316 S4. Among those OTUs, under LP conditions 85 were specifically detected in lateral  
317 roots and 67 in axial roots, indicating a distinct fungal taxonomic structure between  
318 the root types. Under HP conditions 53 OTUs were specific to lateral roots and 111 to  
319 axial roots. Under both P conditions, 67% of these OTUs were also found free-living

320 in soil. However, both axial and lateral roots showed specific OTUs, which were not  
321 detected in bulk soil. Among those, 40 were exclusively enriched in lateral roots and 5  
322 in axial roots under LP conditions. Under HP conditions 19 OTUs were exclusively  
323 enriched in lateral roots and 55 were restricted to axial roots (Fig. 2a). This indicates  
324 that the taxonomic complexity of the fungal community is co-influenced by root type,  
325 P availability and their interaction.

326 To understand how root type and P level influence the taxonomic structure of root  
327 inhabiting fungi, the OTUs were classified at the phylum level (Ascomycota,  
328 Basidiomycota, Glomeromycota, Zygomycota, Chytridiomycota). Because significant  
329 proportions of the microbial diversity were shared among root types, we focused on  
330 the differences in the relative abundance of taxa among root types. Only the OTUs  
331 with at least 1% relative abundance were included for statistical analysis based on a  
332 FDR-corrected Kruskal-Wallis test ( $P < 0.05$ ). Overall, bulk soil and root types  
333 showed divergent abundances of different taxa at the order level (Fig. S3). Despite the  
334 large number of highly abundant orders (Fig. S3), taxonomic information is available  
335 for only a fraction of them (7 OTUs) (Fig. 2b). Root types tended to enrich the lowly  
336 abundant taxa from the soil. Taxa such as Pleosporales were widely enriched in all  
337 root types, and Agaricales were significantly enriched in lateral roots, whereas  
338 Chaetothyriales were significantly enriched in axial roots (Fig. 2b). Moreover, the  
339 taxonomic composition of free-living fungi in bulk soil was more complex than in  
340 roots (Fig. 2c). We further calculated the Shannon index as a measure of fungal  
341 diversity. At LP, the taxonomic diversity was higher in lateral roots than in axial roots,  
342 whereas, at HP the taxonomic diversity was similar for both root types (Fig. 2c). A  
343 dendrogram of differentially abundant phyla, normalized by Z-score across all data  
344 sets, suggested that taxonomic compositions were mainly separated by axial and  
345 lateral root types and only to a minor degree by P status (Fig. 2d). This indicated that  
346 root fungal community composition was stronger more strongly influenced by the  
347 host root types and less by P status. Still, under LP, the relative abundance of OTUs  
348 representing the phyla Zygomycota and Ascomycota was significantly higher in LR as  
349 compared to axial roots, while axial roots accumulated more OTUs for

350 Chytridiomycota under this soil condition than lateral roots (Fig. 2e). Under HP,  
351 lateral roots showed a significantly higher abundance of Basidiomycota and  
352 Glomeromycota as compared to axial roots, whereas under HP conditions none of the  
353 large fungal phyla was enriched in axial roots (Fig. 2f).

#### 354 **Maize root types are differentially colonized by AMF under field conditions**

355 To monitor in detail whether maize root types grown in the field differ in their  
356 colonization levels by AM fungi, we microscopically quantified colonization  
357 frequency of axial roots and 1<sup>st</sup> and 2<sup>nd</sup> order lateral roots (Figs. S4, S5). This revealed  
358 that the 1<sup>st</sup> order lateral roots were more strongly colonized than axial roots or the 2<sup>nd</sup>  
359 order lateral roots under both P conditions (Fig. 3a). However, under LP conditions 1<sup>st</sup>  
360 order lateral roots and axial roots were significantly more colonized than under HP  
361 condition, while surprisingly the P level did not significantly affect colonization of 2<sup>nd</sup>  
362 order lateral roots (Fig. 3a). To support the notion that mycorrhizal colonization might  
363 be linked to functional differences among root types, the genes encoding Pi  
364 transporters of the PHT1 family including *ZmPht1;2*, *ZmPht1;4*, *ZmPht1;5*, *ZmPht1;6*,  
365 *ZmPht1;9*, *ZmPht1;10*, *ZmPht1;11* and *ZmPht1;13* were identified in the RNA-Seq  
366 dataset. Transcript accumulation of all *Pht1* genes was negatively correlated with P  
367 availability (Fig. 3b). All genes were preferentially expressed in lateral roots than in  
368 axial roots reflecting the stronger involvement of lateral roots in P uptake and AM  
369 symbiosis. Furthermore, axial roots exhibited larger variations in genes expression in  
370 response to external P changes than lateral roots (Fig. 3b). The differential  
371 colonization of root types at different P levels was confirmed by transcript  
372 accumulation of the maize AM marker gene *AM3* (Fig. 3b). Taken together, maize  
373 roots types displayed divergent AM colonization frequencies, which depended on  
374 external P status. However, independent of the P status 1<sup>st</sup> order lateral roots were  
375 preferentially colonized.

#### 376 **Divergent transcriptomic responses of maize root types to soil P-availability in** 377 **the field**

378 The transcriptomes of axial and lateral roots were analyzed for significant differences  
379 at each P condition using a log-transformed linear model. This survey revealed that  
380 differential gene expression between axial and lateral roots was partially dependent on

381 the P condition (Fig. 4a). In total, 6,955 genes were differentially expressed between  
382 axial and lateral roots (Fig. 4a). Among those, 2,724 transcripts accumulated  
383 differentially for both P treatments whereas 954 (14%) differed specifically at LP  
384 conditions, while a larger number of 3,277 (47%) transcripts differed specifically at  
385 HP conditions (Fig. 4a). The complete list of differentially expressed genes is  
386 provided in Dataset S5. Based on previously characterized phosphate starvation  
387 responsive (PSR) genes of maize (He *et al.*, 2015), 25 candidate PSR genes  
388 significantly responded to phosphate levels (Fig. 4b), while the other genes  
389 determined by He *et al.*, (2015) were not expressed or did not differ in expression  
390 between the different conditions. These candidate PSR genes clustered into two  
391 groups. Group I includes 17 genes induced by low phosphate in both root types.  
392 Group II includes eight genes, which also respond to low phosphate but are in  
393 addition significantly higher expressed in lateral roots as compared to axial roots (Fig.  
394 4b).

395 Genes differentially expressed between lateral and axial roots under specific P-levels  
396 were assigned to MapMan functional categories to compare the distribution of over-  
397 and under-represented functional classes between root types under low and high P  
398 (Tables S5-9). Based on Fisher's exact test, the functional category "signalling" was  
399 exclusively enriched at low P (Fig. 5a). In contrast, the pathways "metal handling"  
400 and "DNA" were only enriched under high P conditions (Fig. 5a). The genes which  
401 were only differently expressed between the root types at LP (954 genes) and at HP  
402 (3,277 genes; Fig. 4a) were assigned to two classes reflecting the root type in which  
403 they were higher expressed (Fig. 5b). For the four resulting groups of genes,  
404 enrichment of MapMan functional categories was calculated. At LP, the bins "cell  
405 wall" and "signalling" were significantly overrepresented in axial roots (Fig. 5b). At  
406 HP the MapMan bins "cell wall", "secondary metabolism" and "stress" were  
407 significantly overrepresented in lateral roots (Fig. 5b). For example, twelve genes  
408 (GRMZM2G015654, GRMZM2G096268, GRMZM2G103128, GRMZM2G127184,  
409 GRMZM2G333274, GRMZM2G387087, GRMZM2G470010, GRMZM2G471594,  
410 GRMZM2G857459, GRMZM5G870571, GRMZM5G875445, GRMZM5G858456)  
411 related to hemicelluloses synthesis and enriched in "cell wall" category were  
412 exclusively upregulated in lateral roots (Table S8). Moreover, a number of defense-  
413 related, disease resistance and pathogenesis-related genes were enriched in the



414 MapMan bin “stress” and were overrepresented in lateral roots (Table S9).  
415 Interestingly, at LP the category “cell wall” was overrepresented in axial roots while  
416 at HP the same category was overrepresented in lateral roots (Fig. 5b).

417 To uncover links between the genes belonging to given functional categories, we  
418 constructed a functionally connected network with the aid of the STRING algorithm  
419 at a high confidence level of  $>0.7$ . Under LP conditions transcripts  
420 (GRMZM2G017678, GRMZM2G031311, GRMZM2G042179, GRMZM2G052357,  
421 GRMZM2G063949, GRMZM2G161233, GRMZM2G429118) encoding previously  
422 characterized interacting proteins were strikingly enriched in axial roots and  
423 corresponded to cell wall biosynthesis and metabolism (Table S5). In contrast, under  
424 HP conditions eleven secondary metabolism pathways were enriched (Tables S8-10),  
425 of which the three pathways “cell wall precursor synthesis”, “secondary metabolism  
426 flavonoids” and “secondary metabolism phenylpropanoids lignin biosynthesis” were  
427 biologically connected (Fig. 5c; Table S11).

428

429 **Discussion**

430 Different root types of maize display distinct molecular (Gutjahr *et al.*, 2015; Yu *et al.*,  
431 2016b) and physiological characteristics (Tai *et al.*, 2016). Here we tested the  
432 hypothesis that axial and lateral roots of maize provide differentiated niches for root  
433 inhabiting microbes by root-type specific profiling fungal communities in field grown  
434 plants and the surrounding soil. In parallel, we examined the transcriptomes of these  
435 root types, to demonstrate root type-specific differences in physiology, metabolism  
436 and signalling under field conditions.

437 We found differences in the fungal communities between root systems and bulk-soil,  
438 confirming that roots provide a selective environment for microbes (Bulgarelli *et al.*,  
439 2012; de Souza *et al.*, 2016). Strikingly, more than half of the OTUs identified inside  
440 maize roots were specific for one or the other root type (Fig. 2a). Furthermore, the  
441 relative amount of OTUs belonging to certain fungal phyla, the Agaricales,  
442 Sordariales, Ascomycota sp., Chaetothyriales, Mortierellales and Pleosporales, was  
443 significantly different between the two maize root types (Fig. 2b). This demonstrates  
444 that maize root types influence the endophytic fungal community in a realistic field  
445 situation. Differences in bacterial and fungal communities between roots and leaves  
446 and/or stalks have previously been described for *Arabidopsis* and sugar cane (Bai *et*  
447 *al.*, 2015; de Souza *et al.*, 2016). We show that fungal communities diverge even  
448 among different parts of the same plant organ (the root system).

449 Phosphate nutritional status of the plant or the ability of the plant to perceive  
450 phosphate have been shown to strongly affect the composition of the bacterial root  
451 microbiome (Castrillo *et al.*, 2017) and the ability of a fungal endophyte to colonize  
452 *Arabidopsis* (Hacquard *et al.*, 2016; Hiruma *et al.*, 2016). Here we found, that the soil  
453 phosphate level had a profound and root type-specific effect on the structure of fungal  
454 communities (Fig. 2a,b), suggesting that the phosphate status effects niches for fungal  
455 colonization in a root type-specific manner. In field-grown maize roots, phosphate  
456 influenced the  $\beta$ -diversity of root inhabiting fungi specifically in LRs, which  
457 displayed higher  $\beta$ -diversity at low P than high P, while in AR the  $\beta$ -diversity was  
458 similar in both P conditions. Furthermore, the analysis of species composition  
459 suggests that LRs support a higher diversity of Ascomycota at LP and of  
460 Basidiomycota and Glomeromycota at HP, while ARs support a high diversity of

461 Chytridiomycota at LP (Fig. 2d). A slight shift in the fungal community composition  
462 in response to differences in soil phosphate level was also observed in bulk soil,  
463 suggesting that some fungi are influenced by phosphate directly or indirectly for  
464 example through plant phosphate-status dependent root exudates (Yoneyama *et al.*,  
465 2013; Ziegler *et al.*, 2016).

466 It has been demonstrated that the expanded capacity of AM roots to gain soil P by  
467 long-distance transport presents a major contribution to nutrient uptake in crops  
468 (reviewed in Sawers *et al.*, 2008; Smith & Smith, 2011; Gutjahr & Paszkowski, 2013).  
469 We found a root type-specific distribution of AM colonization, with higher  
470 colonization levels in LRs as compared to ARs, as previously reported for rice  
471 (Gutjahr *et al.*, 2015). The accumulation of AM related transcripts such as *Phl1;2*,  
472 *Phl1;5*, and *Phl1;6* correlated with colonization of lateral roots under different P  
473 regimes (Fig. 4e; Liu *et al.*, 2016; Sawers *et al.*, 2017). Increased AM colonization  
474 and induction of AM-specific Pi transporters genes *ZmPhl1;5* and *ZmPhl1;6* in lateral  
475 roots likely enhances P acquisition via mycorrhizal pathway under LP conditions  
476 (Willmann *et al.*, 2013; Deng *et al.*, 2014; Sawers *et al.*, 2017).

477 High phosphate suppressed the amount of root colonization by AMF and the  
478 expression of AM marker and phosphate transporter genes, as previously reported  
479 (Fig. 3d-e, reviewed in Carbonnel & Gutjahr, 2014). Surprisingly, this condition leads  
480 to an increase in the diversity of AMF species, specifically in lateral roots. Root  
481 colonization by AMF is controlled by the plant and is suppressed if the fungus does  
482 not deliver phosphate (Javot *et al.*, 2007). Based on this finding it was hypothesized  
483 that under low phosphate, plants promote root colonization by AMF species, which  
484 are most efficient in phosphate delivery and suppress less efficient species (Gutjahr &  
485 Parniske, 2017). In turn, it is possible that at higher phosphate levels, fungal species,  
486 which are less phosphate-efficient are permitted to colonize, possibly because they  
487 provide other services to the plant such as an increased biotic or abiotic stress  
488 resistance (Gianinazzi *et al.*, 2010).

489 Simultaneous with fungal OTUs in maize root types, we determined more divergent  
490 transcriptomic differences among root types than among P treatments indicating that  
491 root type identity dominated the transcriptional profile (Fig. 1c). However, differential  
492 accumulation of transcripts related to phosphate starvation confirmed that the plants

493 had responded to the phosphate treatment; and some of these transcripts accumulated  
494 differentially between axial and lateral roots (Fig. 4b). A number of transcripts were  
495 enriched in a root type-specific manner independent on the phosphate status, and root  
496 type specificity of the transcriptome was higher under HP than under LP (Fig. 4a).  
497 Under LP the functional categories “cell wall” and “signalling” were overrepresented  
498 in axial roots (Fig. 5a, b; Tables S5, 6). Enrichment of cell wall related transcripts in  
499 crown roots in comparison to lateral roots has also previously been observed in rice  
500 grown under controlled phytochamber conditions (Gutjahr *et al.*, 2015). We  
501 demonstrate here that this also occurs in the field and in a second grass species,  
502 indicating that this is likely a general phenomenon. The increased accumulation of  
503 transcripts encoding cell wall precursors likely promotes a strengthened cell wall  
504 structure, which may explain the lower colonization of axial roots by AM fungi as  
505 compared to lateral roots under LP conditions (Fig. 4a-d; Table S5). Downregulation  
506 of transcripts related to cell wall modification associated with the establishment of  
507 AMF symbioses has also been observed in rice (Gutjahr *et al.*, 2015; Fig. 4a-d; Table  
508 S5), consistent with the higher AMF colonization (Figs 3a). At HP we observed an  
509 enrichment of transcripts belonging to the MapMan functional categories “cell wall”,  
510 “secondary metabolism” and “stress” in lateral roots (Tables S7-9). For example,  
511 twelve genes associated with hemicelluloses synthesis were exclusively upregulated  
512 in lateral roots (Table S8). The most important biological function of hemicelluloses is  
513 their contribution to strengthening the cell wall by tethering cellulose microfibrils  
514 (Scheller & Ulvskov, 2010). Interestingly, a maize *Phl1;6* knock-out, which is  
515 perturbed in mycorrhizal phosphate uptake showed lower expression of cell wall  
516 related genes than the wild-type (Willmann *et al.*, 2013), confirming that also in  
517 phosphate poor soils higher P levels (as in the wild-type) support activation of cell  
518 wall processes.

519 In addition, the transcripts encoding proteins, which may be involved in the inhibition  
520 of fungal pathogens are enriched in lateral roots (Table S8). We observed strong  
521 inductions of defense related transcripts enriched in the MapMan category “stress”  
522 such as *nucleotide-binding, leucine-rich repeat (NB-LRR)* genes (GRMZM2G045027,  
523 GRMZM2G116335, GRMZM2G156351, GRMZM2G440849, GRMZM5G880361),  
524 the *polygalacturonase-inhibiting proteins (PGIPs)* genes (GRMZM2G025105,  
525 GRMZM2G099295, GRMZM2G129493) and the *Respiratory burst oxidase homolog*

526 (*Rboh*) gene family (GRMZM2G037993, GRMZM2G065144, GRMZM2G300965,  
527 GRMZM2G358619), which have all been implicated in defense against fungal  
528 pathogens (Ferrari *et al.*, 2003; Torres & Dangl, 2005; Gao *et al.*, 2011; Table S9).  
529 Furthermore, lignin biosynthesis genes such as *4CL1* (*4-coumarate: CoA ligase 1*;  
530 GRMZM2G048522, GRMZM2G174732) (Fraser & Chapple, 2011), the expression  
531 of which has been shown to correlate with lignin deposition, may be involved in  
532 protecting lateral root initiation sites against pathogen infiltration (Fig. 5c; Tables S10,  
533 11). Taken together, these results indicate that distinct biological processes are  
534 enriched in divergent root types at different external P concentrations, due to a  
535 specific difference in the adaptive responses among the root types to external P levels  
536 (Figs 2c, d, 5; Tables S7, 8).

537 In Arabidopsis, phosphate sufficiency was associated with increased defense gene  
538 expression in roots. This was made responsible for changes in a synthetic bacterial  
539 rhizosphere and root community (Castrillo *et al.*, 2017) and suppression of the  
540 endophytic fungus *Colletotrichum tofieldiae*, which delivers phosphate under LP  
541 conditions (Hacquard *et al.*, 2016; Hiruma *et al.*, 2016). We hypothesize that  
542 phosphate-induced defense responses in lateral roots could also be responsible for the  
543 fungal community shifts we observed in field-grown maize roots grown at HP (Fig. 5).  
544 We consider it likely that specific reprogramming of root types in response to the soil  
545 phosphate condition determines the root type-specific fungal community composition  
546 (see summary in Fig. 6). However, we do not exclude that part of the observed  
547 transcript accumulation occurs in response to the colonization by the fungi. In  
548 addition it is most likely that also the community composition of other microbes such  
549 as bacteria, is influenced by root type specific niches and phosphate conditions and  
550 that in turn these communities have an impact on the root transcriptome and  
551 physiology. It remains to be determined to which extent transcriptome shifts in  
552 response to environmental stimuli such as phosphate are causative for fungal  
553 colonization or in turn influenced by the inhabiting fungi. Nevertheless, the data  
554 presented here provide a framework for novel research aiming at an understanding of  
555 root type-specific responses to biotic and abiotic factors and will guide future efforts  
556 to improve plant growth and fitness, through application of soil microbes.

557 **Acknowledgements**

558 Root research in C.L.'s laboratory is supported by grants of the State Key Basic  
559 Research and Development Plan of China (No. 2013CB127402) and the Innovative  
560 Group Grant of the National Natural Science Foundation of China (NSFC) (No.  
561 31421092). Maize root research in F.H.'s laboratory is supported by the Deutsche  
562 Forschungsgemeinschaft (DFG) and the Federal Ministry of Education and Research  
563 (BMBF). C.G. is supported by the Emmy Noether program (GU1423/1-1) of the DFG  
564 and her maize field research by BayKlimaFit of the Bavarian Ministry of  
565 Environment and Consumer Protection.  
566

567 **Author Contribution**

568 C.L and F.H. conceived and designed this field experiment. C.W. collected the field  
569 samples and performed the arbuscular mycorrhizal staining experiments. P.Y.  
570 analyzed the fungal ITS data. P.Y., J.A.B. and H.T. analyzed the transcriptome data.  
571 C.G and F.H. contributed to data interpretation. P.Y. and C.G. wrote the manuscript.  
572

573 **Figure legends**

574 **Fig. 1. Fungal community composition and root transcriptomes differ among**  
575 **maize root types and soil phosphate levels.** (a) Illustration of maize plants depicting  
576 the axial and lateral roots sampled from the top 30 cm soil layer. (b) Multidimensional  
577 scaling plot of fungal communities in root types and bulk soils under HP and LP as  
578 profiled by ITS gene sequencing. (c) Multidimensional scaling plot of RNA  
579 populations in maize root types under HP and LP. AR, axial roots; BS, bulk soil; HP,  
580 high phosphate; LP, low phosphate; LR, lateral roots.

581 **Fig. 2. Abundance of fungal taxonomic units in maize roots and bulk soil with**  
582 **low- or high- P supply.** (a) Numbers of differentially enriched fungal OTUs in maize  
583 roots and bulk soil. (b) Relative abundance in root types of fungal taxa at the order  
584 level. The figure shows the same distribution of significantly enriched fungal taxa as  
585 in Fig. S3, without the taxa that were highly enriched in soil and not significantly  
586 different among root types. The fungal order Mortierellales with different OTUs  
587 indicates different taxonomic identifications. Statistical significance was tested using  
588 the Kruskal-Wallis test (FDR-corrected  $P < 0.05$ ) at the order level. (c) Shannon index  
589 of fungal communities in root type and bulk soil samples at two different phosphate  
590 levels. Asterisks denote significant differences between low and high P levels for a  
591 given root type according to Tukey's post-hoc test ( $*P < 0.05$ ;  $**P < 0.01$ ). Asterisks  
592 denote significant fungal diversity between two soil types according to Student's  $t$   
593 tests ( $*P < 0.05$ ;  $**P < 0.01$ ). (d) Hierarchical clustering analysis based on the OTUs of  
594 axial and lateral roots under LP or HP at the phylum level. Relative abundance of  
595 differentially abundant phyla are shown and normalized by Z-score across all datasets.  
596 The dendrogram was inferred by applying the unweighted pair group method with the  
597 arithmetic mean (UPGMA) as distance function. Distinct phyla enriched in axial and  
598 lateral roots under low (e) and high (f) P supply. AR, axial root; HP, high phosphate;  
599 LP, low phosphate; LR, lateral root; OTU, operational taxonomic unit. Asterisks  
600 denote significantly enriched phyla between axial and lateral roots according to paired  
601 Student's  $t$  tests ( $*P < 0.05$ ;  $**P < 0.01$ ).

602 **Fig. 3. Colonization by AMF and expression of *ZmPht* genes in different root**  
603 **types of maize grown under LP and HP conditions.** (a) Frequency of AM  
604 colonization (%) under HP (high phosphate) and LP (low phosphate) conditions.



605 Asterisks denote significant differences between low and high P levels for a given root  
606 type according to paired Student's *t* tests (\**P* <0.05; \*\**P* <0.01). Different letters  
607 above each bar indicate significant differences among all conditions as assessed by  
608 post-hoc test (*P* <0.05). (b) Accumulation of *ZmPht* transcripts. The expression values  
609 were normalized by log<sub>2</sub> transformed fragments per kilobase of transcript per million  
610 reads (FPKM). Significant differences are indicated by different letters (Tukey's post-  
611 hoc test, *P* <0.05) and were calculated independently for each gene.

612 **Fig. 4. Root type-specific transcriptional responses to phosphate status.** (a) Venn  
613 diagram illustrating the number of genes, which are differentially expressed between  
614 root types under low or high P conditions. FDR <0.05; |F<sub>c</sub>| >2. (b) Expression pattern  
615 of phosphate starvation response (PSR) genes in maize root types. In total, 25 PSR  
616 genes (He *et al.*, 2015) were detected from the list of genes, which are differentially  
617 expressed among root types. The expression values were normalized by log<sub>2</sub>  
618 transformed FPKM. Significant differences are indicated by different letters (Tukey's  
619 post-hoc test, *P* <0.05) and were calculated independently for each gene.

620 **Fig. 5. Enrichment of functional categories in maize root transcriptomes under**  
621 **LP and HP conditions.** (a) Significantly enriched MapMan pathways under low and  
622 high P conditions detected by Fisher's exact test (*P* <0.05). (b) Functional categories  
623 in which the ratio of preferentially expressed genes differed significantly from the  
624 ratio of all expressed genes from the enriched MapMan categories. The expected  
625 number of genes for each functional category was calculated based on the distribution  
626 of functional categories among all expressed genes. To determine, which genes were  
627 significantly overrepresented in which individual MapMan category, a  $\chi^2$  test for  
628 independence with Yates' continuity correction was performed. \*\**P* <0.01; \*\*\**P*  
629 <0.001. (c) Network view of genes with high confidence scores of >0.7 generated  
630 using the STRING v10 prediction algorithm (Szklarczyk *et al.*, 2015). Color codes  
631 from gray to red indicate expression levels of transcripts enriched in axial roots  
632 normalized as log<sub>2</sub> logarithm of fold changes (log<sub>2</sub>F<sub>c</sub>) under high phosphate  
633 conditions.

634 **Fig. 6. Summary of phosphate-dependent enrichment of functional**  
635 **transcriptome categories and of host-inhibiting fungal communities in field-**  
636 **grown root types.** Under P-deficient conditions, selective colonization by nutrient-

637 delivering AMF and higher expression of P foraging genes in lateral roots might  
638 contribute to P acquisition of the shoot (Figs 3, 4b). Enrichment of cell wall  
639 metabolism in axial roots might explain the relatively higher colonization in axial  
640 roots under LP conditions compared to HP conditions (Fig. 5). Under P-sufficient  
641 conditions, P acquisition is mainly contributed by the host roots themselves with less  
642 fungal colonization (Fig. 3). In contrast, enrichment of defense-related biological  
643 processes in lateral roots might be induced by high P accumulation in both, bulk soil  
644 and plant shoot (Fig. 5; Tables S1, S2, S4). Solid arrows of different thickness  
645 indicate the degrees of P acquisition by direct phosphate uptake. Dotted arrows  
646 indicate the contribution of P acquisition via AM. Fungal communities are represented  
647 by diverse shapes of different symbols, of which the black and white “dots” indicate  
648 AMF. AR, axial roots; HP, high phosphate; LP, low phosphate; LR, lateral roots.

649

650 **Supporting Information**

651 **Fig. S1. RNA quality assessment of 16 maize root type samples collected from the**  
652 **field.** AR, axial root; HP, high phosphate; LP, low phosphate; LR, lateral root; RIN,  
653 RNA integrity number.

654 **Fig. S2. Diversity index (alpha rarefaction) of ITS sequences.** Chao 1 is estimated  
655 as the species abundance. AR, axial root; BS, bulk soil; HP, high phosphate; LP, low  
656 phosphate; LR, lateral root.

657 **Fig. S3. Relative abundance of fungal taxa in maize root types at two phosphate**  
658 **levels.** Orders with an average relative abundance lower than 1% were attributed to  
659 “others”. Statistical significance was tested using the Kruskal-Wallis test (FDR-  
660 corrected  $P < 0.05$ ) at the order level. Un: Unknown. The same taxa names indicate  
661 different OTU identities. AR, axial root; BS, bulk soil; HP, high phosphate; LP, low  
662 phosphate; LR, lateral root.

663 **Fig. S4. Distribution of AM colonization in maize root types along the**  
664 **longitudinal root axis.** Axial and lateral root types were dissected along the whole  
665 axial root into 5 cm pieces and stained by Trypan blue under LP conditions (a) and HP  
666 conditions (b). Dotted lines across the axial roots indicate the positions at which the  
667 root segments were collected and stained. Each pair of pictures above the dotted lines  
668 are representative for lateral and axial root types from different segments of the whole  
669 axis. The red line indicates lateral roots grown under LP conditions. The blue line  
670 indicates axial roots grown under HP conditions. The yellow line indicates lateral  
671 roots grown under HP conditions. The green line indicates axial roots grown under HP  
672 conditions. Asterisks denote significant colonization differences between axial and  
673 lateral root types given a specific P level according to paired Student's  $t$  tests ( $*P$   
674  $< 0.05$ ;  $**P < 0.01$ ). AM, arbuscular mycorrhiza; HP, high phosphate; LP, low  
675 phosphate.

676 **Fig. S5. Visualization of fungal structures in axial root, 1<sup>st</sup> and 2<sup>nd</sup> order lateral**  
677 **roots stained with Trypan blue.** AR, axial root; 1<sup>st</sup>LR, 1<sup>st</sup> order lateral roots; 2<sup>nd</sup> LR,  
678 2<sup>nd</sup> order lateral roots; HP, high phosphate; LP, low phosphate. Scale bar = 200  $\mu\text{m}$ .

679 **Dataset S1. Assembly results and quality control of fungal ITS sequencing.**

680 **Dataset S2. Overview of RNA-Seq output, mapping results and alignments to the**  
681 **B73 reference genome.**

682 **Dataset S3. Complete list of 27,375 expressed genes.**

683 **Dataset S4. Complete list of relative abundance of fungal enriched OTUs and**  
684 **taxonomy information.**

685 **Dataset S5. Complete list of 6,955 differentially expressed genes under both LP**  
686 **and HP conditions.** HP, high phosphate; LP, low phosphate. The differentially  
687 expressed were divided into three groups according to the Fig. 4a. Light grey color  
688 indicates the root type-specific differentially expressed genes under the LP conditions.  
689 Dark grey indicates the root type-specific differentially expressed genes under the HP  
690 conditions.

691

692 **References**

- 693 **Aira M, Gómez-Brandóna M, Lazcano C, Bååth E, Domínguez J. 2010.** Plant  
694 genotype strongly modifies the structure and growth of maize rhizosphere  
695 microbial communities. *Soil Biology and Biochemistry* **42**: 2276–2281.
- 696 **Ambardar S, Singh HR, Gowda M, Vakhlu J. 2016.** Comparative metagenomics  
697 reveal phylum level temporal and spatial changes in mycobiome of belowground  
698 parts of *Crocus sativus*. *PLoS One* **11**: e0163300.
- 699 **Bai Y, Müller DB, Srinivas G, Garrido-Oter R, Potthoff E, Rott M, Dombrowski**  
700 **N, Münch PC, Spaepen S, Remus-Emsermann M, Hüttl B, McHardy AC,**  
701 **Vorholt JA, Schulze-Lefert P. 2015.** Functional overlap of the *Arabidopsis* leaf  
702 and root microbiota. *Nature* **528**: 364–369.
- 703 **Benjamini Y, Hochberg Y. 1995.** Controlling the false discovery rate: a practical and  
704 powerful approach to multiple testing. *Journal of the Royal Statistical Society.*  
705 *Series B (Methodological)* **57**: 289–300.
- 706 **Berendsen RL, Pieterse CMJ, Bakker PA. 2012.** The rhizosphere microbiome and  
707 plant health. *Trends in Plant Science* **17**: 478–486.
- 708 **Bonfante P, Genre A. 2010.** Mechanisms underlying beneficial plant-fungus  
709 interactions in mycorrhizal symbiosis. *Nature Communications* **1**: 48.
- 710 **Bouffaud ML, Kyselková M, Gouesnard B, Grundmann G, Muller D, Moënne-**  
711 **Loccoz Y. 2012.** Is diversification history of maize influencing selection of soil  
712 bacteria by roots? *Molecular Ecology* **21**: 195–206.
- 713 **Bulgarelli D, Rott M, Schlaeppi K, Ver Loren van Themaat E, Ahmadinejad N,**  
714 **Assenza F, Rauf P, Huettel B, Reinhardt R, Schmelzer E et al. 2012.**  
715 Revealing structure and assembly cues for *Arabidopsis* root-inhabiting bacterial  
716 microbiota. *Nature* **488**: 91–95.
- 717 **Bulgarelli D, Schlaeppi K, Spaepen S, Ver Loren van Themaat E, Schulze-Lefert**  
718 **P. 2013.** Structure and functions of the bacterial microbiota of plants. *Annual*  
719 *Review of Plant Biology* **64**: 807–838.
- 720 **Caporaso G, Kuczynski J, Stombaugh J, Bittinger K, Bushman FD, Costello EK,**

- 721 **Fierer N, Pena AG, Goodrich JK, Gordon JI et al. 2010.** QIIME allows  
722 analysis of high-throughput community sequencing data. *Nature Methods* **7**:  
723 335–336.
- 724 **Carbonnel S, Gutjahr C. 2014.** Control of arbuscular mycorrhiza development by  
725 nutrient signals. *Frontiers in Plant Science* **5**: 462.
- 726 **Castrillo G, Teixeira PJ, Paredes SH, Law TF, de Lorenzo L, Feltcher ME,  
727 Finkel OM, Breakfield NW, Mieczkowski P, Jones CD, Paz-Ares J. 2017.**  
728 Root microbiota drive direct integration of phosphate stress and immunity.  
729 *Nature* **543**: 513–518.
- 730 **Coudert Y, Périn C, Courtois B, Khong NG, Gantet P. 2010.** Genetic control of  
731 root development in rice, the model cereal. *Trends in Plant Science* **15**: 219–226.
- 732 **De Souza RS, Okura VK, Armanhi JS, Jorrín B, Lozano N, Da Silva MJ,  
733 González-Guerrero M, De Araújo LM, Verza NC, Bagheri HC et al. 2016.**  
734 Unlocking the bacterial and fungal communities assemblages of sugarcane  
735 microbiome. *Scientific Reports* **6**: 28774.
- 736 **Deng Y, Chen K, Teng W, Zhan A, Tong Y, Feng G, Cui Z, Zhang F, Chen X.**  
737 **2014.** Is the inherent potential of maize roots efficient for soil phosphorus  
738 acquisition? *PLoS One* **9**: e90287.
- 739 **Edwards J, Johnson C, Santos-Medellín C, Lurie E, Podishetty NK, Bhatnagar S,  
740 Eisen JA, Sundaresan V. 2015.** Structure, variation, and assembly of the root-  
741 associated microbiomes of rice. *Proceedings of the National Academy of*  
742 *Sciences, USA* **112**: E911–E920.
- 743 **Ferrari S, Vairo D, Ausubel FM, Cervone F, De Lorenzo G. 2003.** Tandemly  
744 duplicated *Arabidopsis* genes that encode polygalacturonase-inhibiting proteins  
745 are regulated coordinately by different signal transduction pathways in response  
746 to fungal infection. *Plant Cell* **15**: 93–106.
- 747 **Fiorilli V, Vallino M, Biselli C, Faccio A, Bagnaresi P, Bonfante P. 2015.** Host and  
748 non-host roots in rice: cellular and molecular approaches reveal differential  
749 responses to arbuscular mycorrhizal fungi. *Frontiers in Plant Science* **6**: 636.

- 750 **Fraser CM, Chapple C. 2011.** The phenylpropanoid pathway in *Arabidopsis*. *The*  
751 *Arabidopsis Book* **9**: e0152.
- 752 **Gao Z, Chung EH, Eitas TK, Dangl JL. 2011.** Plant intracellular innate immune  
753 receptor Resistance to *Pseudomonas syringae* pv. *maculicola* 1 (RPM1) is  
754 activated at, and functions on, the plasma membrane. *Proceedings of the*  
755 *National Academy of Sciences, USA* **108**: 7619–7624.
- 756 **Gianinazzi S, Gollotte A, Binet MN, van Tuinen D, Redecker D, Wipf D. 2010.**  
757 Agroecology: the key role of arbuscular mycorrhizas in ecosystem services.  
758 *Mycorrhiza* **20**: 519–530.
- 759 **Gore MA, Chia JM, Elshire RJ, Sun Q, Ersoz ES, Hurwitz BL, Peiffer JA,**  
760 **McMullen MD, Grills GS, Ross-Ibarra J et al. 2009.** A first-generation  
761 haplotype map of maize. *Science* **326**: 1115–1117.
- 762 **Gutjahr C, Banba M, Croset V, An K, Miyao A, An G, Hirochika H, Imaizumi-**  
763 **Anraku H, Paszkowski U. 2008.** Arbuscular mycorrhiza-specific signaling in  
764 rice transcends the common symbiosis signaling pathway. *Plant Cell* **20**: 2989–  
765 3005.
- 766 **Gutjahr C, Casieri L, Paszkowski U. 2009.** *Glomus intraradices* induces changes in  
767 root system architecture of rice independently of common symbiosis signaling.  
768 *New Phytologist* **182**: 829–837.
- 769 **Gutjahr C, Parniske M. 2013.** Cell and developmental biology of arbuscular  
770 mycorrhiza symbiosis. *Annual Review in Cell and Developmental Biology* **29**:  
771 593–617.
- 772 **Gutjahr C, Parniske M. 2017.** Cell Biology: control of partner life-time in a plant-  
773 fungus relationship. *Current Biology* **27**: R420–R423.
- 774 **Gutjahr C, Paszkowski U. 2013.** Multiple control levels of root system remodeling  
775 in arbuscular mycorrhizal symbiosis. *Frontiers in Plant Science* **4**: 204.
- 776 **Gutjahr C, Sawers RJ, Marti G, Andrés-Hernández L, Yang SY, Casieri L,**  
777 **Angliker H, Oakeley EJ, Wolfender JL, Abreu-Goodger C et al. 2015.**  
778 Transcriptome diversity among rice root types during a symbiosis and interaction

779 with arbuscular mycorrhizal fungi. *Proceedings of the National Academy of*  
780 *Sciences, USA* **112**: 6754–6759.

781 **Hacquard S, Kracher B, Hiruma K, Münch PC, Garrido-Oter R, Thon MR,**  
782 **Weimann A, Damm U, Dallery J, Hainaut M *et al.* 2016.** Survival trade-offs in  
783 plant roots during colonization by closely related beneficial and pathogenic fungi.  
784 *Nature Communications* **7**:11362.

785 **He C, Liu H, Su S, Lu Y, Luo B, Nie Z, Wu L, Liu D, Zhang X, Rong T, Gao S.**  
786 **2015.** Genome-wide identification of candidate phosphate starvation responsive  
787 genes and the development of intron length polymorphism markers in maize.  
788 *Plant Breeding* **134**: 11–16.

789 **Hiruma K, Gerlach N, Sacristán S, Nakano RT, Hacquard S, Kracher B,**  
790 **Neumann Ulla, Ramírez D, Bucher M, O’Connell RJ *et al.* 2016.** Root  
791 endophyte *Colletotrichumtofieldiae* confers plant fitness benefits that are  
792 phosphate status dependent. *Cell* **165**: 464–474.

793 **Javot H, Penmetsa RV, Terzaghi N, Cook DR, Harrison MJ. 2007.** A *Medicago*  
794 *truncatula* phosphate transporter indispensable for the arbuscular mycorrhizal  
795 symbiosis. *Proceedings of the National Academy of Sciences, USA* **104**: 1720–  
796 1725.

797 **Kanehisa M, Goto S, Sato Y, Furumichi M, Tanabe M. 2011.** KEGG for  
798 integration and interpretation of large-scale molecular data sets. *Nucleic Acids*  
799 *Research* **40**: D109–D114.

800 **Kõljalg U, Nilsson RH, Abarenkov K, Tedersoo L, Taylor AF, Bahram M, Bates**  
801 **ST, Bruns TD, Bengtsson-Palme J, Callaghan TM, Douglas B. 2013.** Towards  
802 a unified paradigm for sequence-based identification of fungi. *Molecular*  
803 *Ecology* **22**: 5271–5277.

804 **Liu F, Xu Y, Jiang H, Jiang C, Du Y, Gong C, Wang W, Zhu S, Han G, Cheng B.**  
805 **2016.** Systematic identification, evolution and expression analysis of the *Zea*  
806 *mays* *PHT1* gene family reveals several new members involved in root  
807 colonization by arbuscular mycorrhizal fungi. *International Journal of*



- 808 *Molecular Sciences* **17**: 930.
- 809 **Lu L, Yin S, Liu X, Zhang W, Gu T, Shen Q, Qiu H. 2013.** Fungal networks in  
810 yield-invigorating and-debilitating soils induced by prolonged potato  
811 monoculture. *Soil Biology and Biochemistry* **65**: 186–194.
- 812 **Lundberg DS, Lebeis SL, Paredes SH, Yourstone S, Gehring J, MalfattiS,**  
813 **Tremblay J, Engelbrektsen A, Kunin V, Del Rio TG et al. 2012.** Defining the  
814 core *Arabidopsis thaliana* root microbiome. *Nature* **488**: 86–90.
- 815 **Magoč T, Salzberg SL. 2011.** FLASH: fast length adjustment of short reads to  
816 improve genome assemblies. *Bioinformatics* **27**: 2957–2963.
- 817 **Marcon C, Malik WA, Walley JW, Shen Z, Paschold A, Smith LG, Piepho H,**  
818 **Briggs SP, Hochholdinger F. 2015.** A high resolution tissue-specific proteome  
819 and phosphoproteome atlas of maize primary roots reveals functional gradients  
820 along the root axis. *Plant Physiology* **168**: 233–246.
- 821 **Marschner H. 1995.** Mineral nutrition of higher plants. London: Academic Press.
- 822 **Mendes R, Kruijt M, De Bruijn I, Dekkers E, Van der Voort M, Schneider JH,**  
823 **Piceno YM, DeSantis TZ, Andersen GL, Bakker PA et al. 2011.** Deciphering  
824 the rhizosphere microbiome for disease-suppressive bacteria. *Science* **332**: 1097–  
825 1100.
- 826 **Ofek-Lalzar M, Sela N, Goldman-Voronov M, Green SJ, Hadar Y, Minz D. 2014.**  
827 Niche and host-associated functional signatures of the root surface microbiome.  
828 *Nature Communications* **5**: 4950.
- 829 **Peng Y, Yu P, Zhang Y, Sun G, Ning P, Li X, Li C. 2012.** Temporal and spatial  
830 dynamics in root length density of field-grown maize and NPK in the soil profile.  
831 *Field Crops Research* **131**: 9–16.
- 832 **Phillips JM, Hayman DS. 1970.** Improved procedures for clearing roots and staining  
833 parasitic and vesicular-arbuscular mycorrhizal fungi for rapid assessment of  
834 infection. *Transactions of the British Mycological Society* **55**: 158–161.
- 835 **Poirier Y, Bucher M. 2002.** Phosphate transport and homeostasis in *Arabidopsis*. In:  
836 Somerville C, Meyerowitz EM, eds. *The Arabidopsis book*. Rockville, MD, USA:

- 837 American Society of Plant Biologists, 1–35.
- 838 **Rogers ED, Benfey PN. 2015.** Regulation of plant root system architecture:  
839 implications for crop advancement. *Current Opinion in Biotechnology* **32**: 93–98.
- 840 **Sawers RJ, Gutjahr C, Paszkowski U. 2008.** Cereal mycorrhiza: an ancient  
841 symbiosis in modern agriculture. *Trends in Plant Science* **13**: 93–97.
- 842 **Sawers RJ, Svane SF, Quan C, Gronlund M, Wozniak B, Gonzalez-Munoz E,  
843 Chavez Montes R, Baxter I, Goudet J, Jakobsen I, Paszkowski U. 2017.**  
844 Phosphorus acquisition efficiency in arbuscular mycorrhizal maize is correlated  
845 with the abundance of root-external hyphae and the accumulation of transcripts  
846 encoding PHT1 phosphate transporters. *New Phytologist* **214**: 632–643.
- 847 **Scheller HV, Ulvskov P. 2010.** Hemicelluloses. *Annual Review of Plant Biology* **61**:  
848 263–289.
- 849 **Schoch CL, Seifert KA, Huhndorf S, Robert V, Spouge JL, Levesque CA, Chen  
850 W, Bolchacova E, Voigt K, Crous PW, Miller AN. 2012.** Nuclear ribosomal  
851 internal transcribed spacer (ITS) region as a universal DNA barcode marker for  
852 Fungi. *Proceedings of the National Academy of Sciences, USA* **109**: 6241–6246.
- 853 **Smith ME, Greg WD, David MR. 2007.** Ectomycorrhizal community structure in a  
854 xeric *Quercus* woodland based on rDNA sequence analysis of sporocarps and  
855 pooled roots. *New Phytologist* **174**: 847–863.
- 856 **Smith SE, Read DJ. 2008.** The symbionts forming arbuscular mycorrhizas. In: Smith  
857 SE, Read DJ, eds. *Mycorrhizal Symbiosis*. Cambridge, UK: Academic Press, 13–  
858 41.
- 859 **Smith SE, Smith FA. 2011.** Roles of arbuscular mycorrhizas in plant nutrition and  
860 growth: new paradigms from cellular to ecosystem scales. *Annual Review of  
861 Plant Biology* **62**: 227–250.
- 862 **Smyth GK. 2004.** Linear models and empirical bayes methods for assessing  
863 differential expression in microarray experiments. *Statistical Applications in  
864 Genetics and Molecular Biology* **3**: 1–25.
- 865 **Smyth GK. 2005.** Limma: linear models for microarray data. In: Gentleman RC,

- 866 Carey VJ, Huber W, Irizarry RA, Dudoit S, eds. *Bioinformatics and*  
867 *Computational Biology Solutions Using R and Bioconductor*. New York:  
868 Springer, 397–420.
- 869 **Szklarczyk D, Franceschini A, Wyder S, Forslund K, Heller D, Huerta-Cepas J,**  
870 **Simonovic M, Roth A, Santos A, Tsafou KP et al. 2015.** STRING v10: protein-  
871 protein interaction networks, integrated over the tree of life. *Nucleic Acids*  
872 *Research* **43**: D447–D452.
- 873 **Tai H, Lu X, Opitz N, Marcon C, Paschold A, Lithio A, Nettleton D,**  
874 **Hochholdinger, F. 2016.** Transcriptomic and anatomical complexity of primary,  
875 seminal, and crown roots highlight root type-specific functional diversity in  
876 maize (*Zea mays* L.). *Journal of Experimental Botany* **67**: 1123–1135.
- 877 **Tedersoo L, Nilsson RH, Abarenkov K, Jairus T, Sadam A, Saar I, Bahram M,**  
878 **Bechem E, Chuyong G, Kõljalg U. 2010.** 454 Pyrosequencing and Sanger  
879 sequencing of tropical mycorrhizal fungi provide similar results but reveal  
880 substantial methodological biases. *New Phytologist* **188**: 291–301.
- 881 **Thimm O, Bläsing O, Gibon Y, Nagel A, Meyer S, Krüger P, Selbig J, Müller LA,**  
882 **Rhee SY, Stitt M. 2004.** MAPMAN: a user-driven tool to display genomics data  
883 sets onto diagrams of metabolic pathways and other biological processes. *The*  
884 *Plant Journal* **37**: 914–939.
- 885 **Torres MA, Dangl JL. 2005.** Functions of the respiratory burst oxidase in biotic  
886 interactions, abiotic stress and development. *Current Opinion in Plant Biology* **8**:  
887 397–403.
- 888 **Trouvelot A, Kough JL, Gianinazzi-Pearson V. 1986.** Mesure du taux de  
889 mycorhization VA d'un système racinaire. Recherche de méthodes d'estimation  
890 ayant une signification fonctionnelle. In: Gianinazzi-Pearson V, Gianinazzi S,  
891 eds. *Physiological and genetical aspects of mycorrhizae*. Paris: INRA Press,  
892 217–221.
- 893 **Vrålstad T. 2004.** Are ericoid and ectomycorrhizal fungi part of a common guild?  
894 *New Phytologist* **164**: 7–10.

- 895 **Wang C, White PJ, Li C. 2017.** Colonization and community structure of arbuscular  
896 mycorrhizal fungi in maize roots at different depths in the soil profile respond  
897 differently to phosphorus inputs on a long-term experimental site. *Mycorrhiza* 27:  
898 369–381.
- 899 **Willmann M, Gerlach N, Buer B, Polatajko A, Nagy R, Koebke E, Jansa J, Flisch  
900 R, Bucher M. 2013.** Mycorrhizal phosphate uptake pathway in maize: vital for  
901 growth and cob development on nutrient poor agricultural and greenhouse soils.  
902 *Frontiers in Plant Science* 4: 533.
- 903 **Yoneyama K, Kisugi T, Xie X, Yoneyama K. 2013.** Chemistry of strigolactones:  
904 why and how do plants produce so many strigolactones? In: de Bruijn FJ, ed.  
905 *Molecular Microbial Ecology of the Rhizosphere: Two Volume Set*. John Wiley &  
906 Sons, Hoboken, NJ, 373–379.
- 907 **Yu P, Eggert K, Von Wirén N, Li C, Hochholdinger F. 2015.** Cell-type specific  
908 gene expression analyses by RNA-Seq reveal local high nitrate triggered lateral  
909 root initiation in shoot-borne roots of maize by modulating auxin-related cell  
910 cycle-regulation. *Plant Physiology* 169: 690–704.
- 911 **Yu P, Gutjahr C, Li C, Hochholdinger F. 2016a.** Genetic control of lateral root  
912 formation in cereals. *Trends in Plant Science* 21: 951–961.
- 913 **Yu P, Baldauf J, Lithio A, Marcon C, Nettleton D, Li C, Hochholdinger F. 2016b.**  
914 Root type specific reprogramming of maize pericycle transcriptomes by local  
915 high nitrate results in disparate lateral root branching patterns. *Plant Physiology*  
916 170: 1783–1798.
- 917 **Ziegler J, Schmidt S, Chutia R, Müller J, Böttcher C, Strehmel N, Scheel D, Abel  
918 S. 2016.** Non-targeted profiling of semi-polar metabolites in *Arabidopsis* root  
919 exudates uncovers a role for coumarin secretion and lignification during the local  
920 response to phosphate limitation. *Journal of Experimental Botany* 67: 1421–1432.

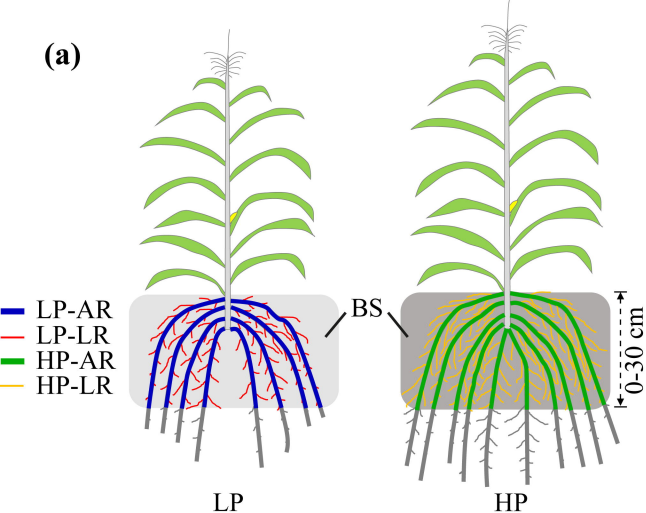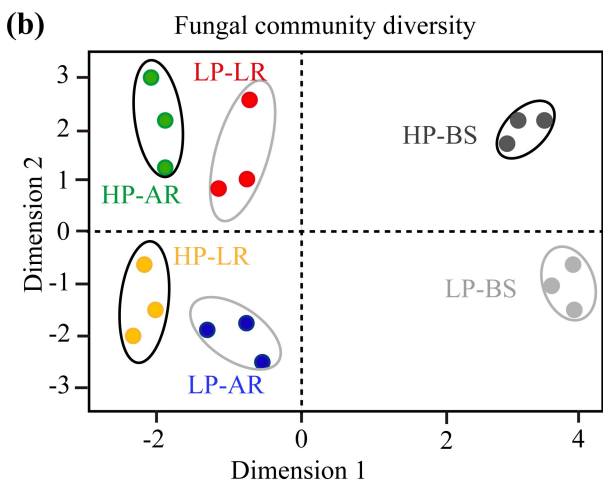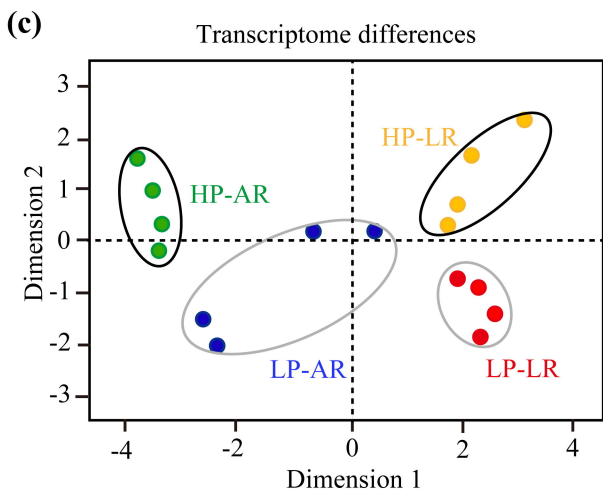

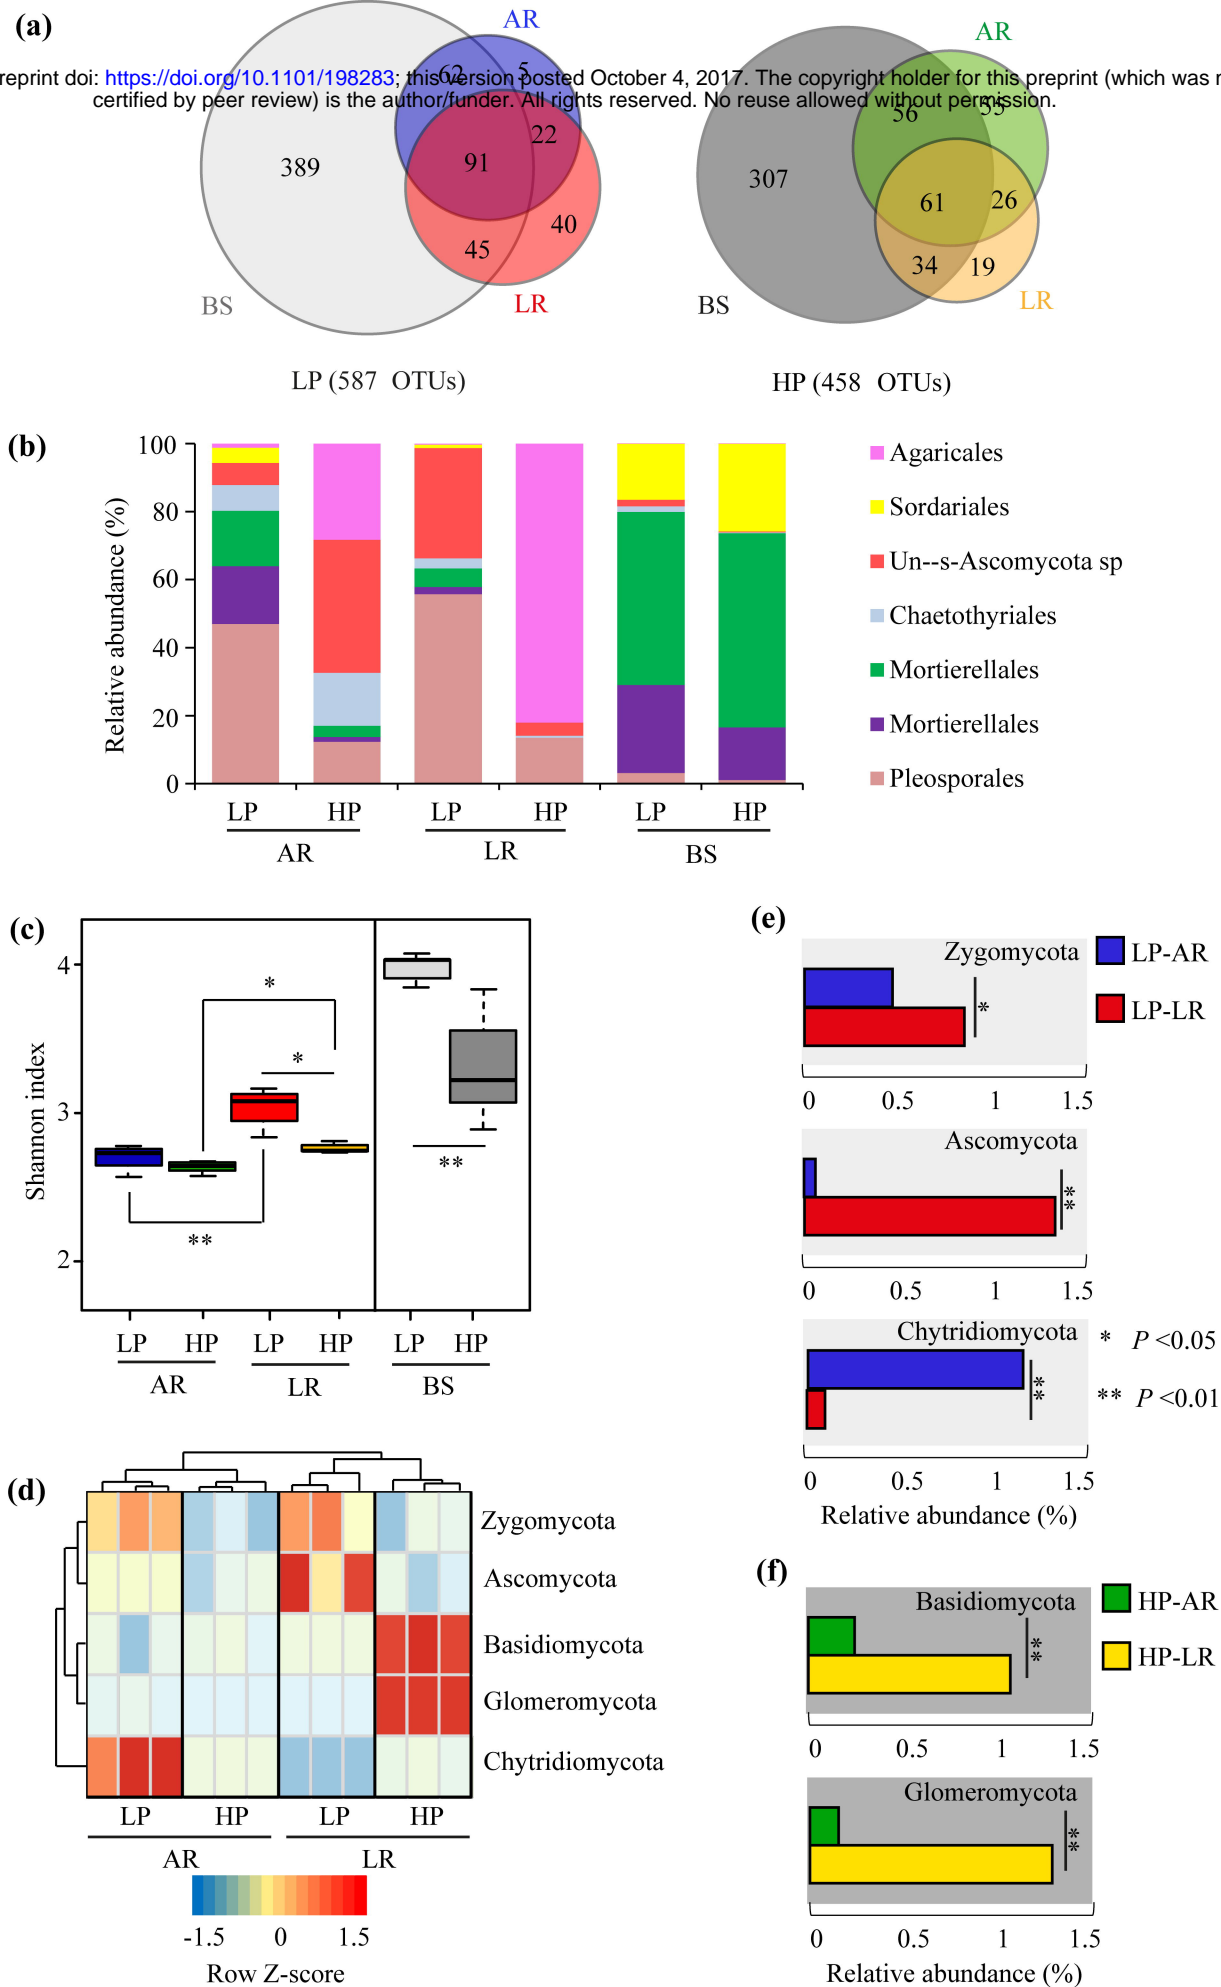

Figure 2

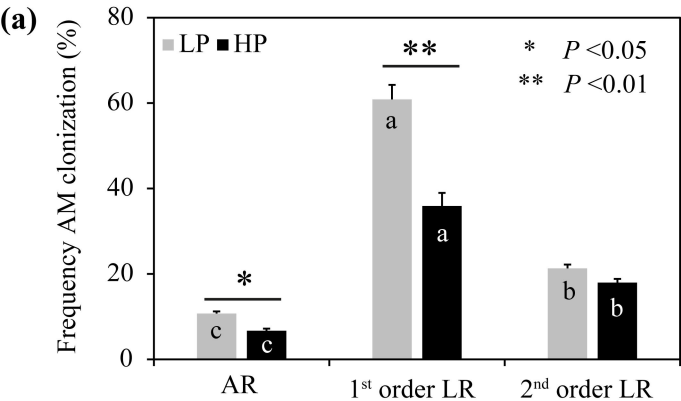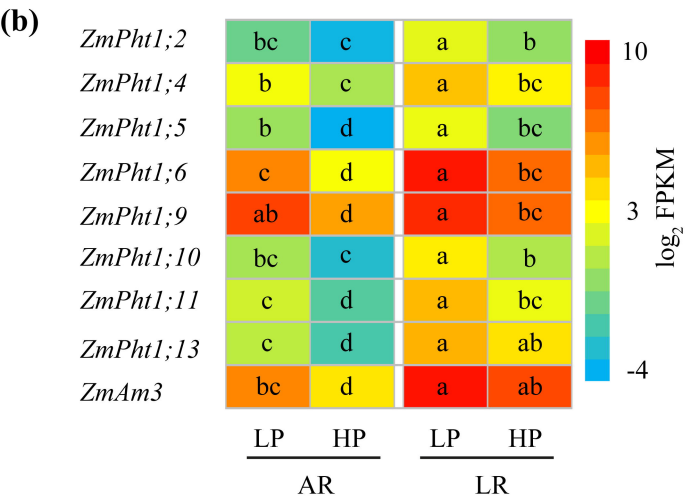

**(a)**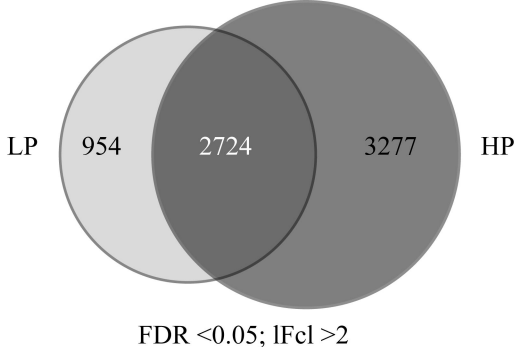**(b)**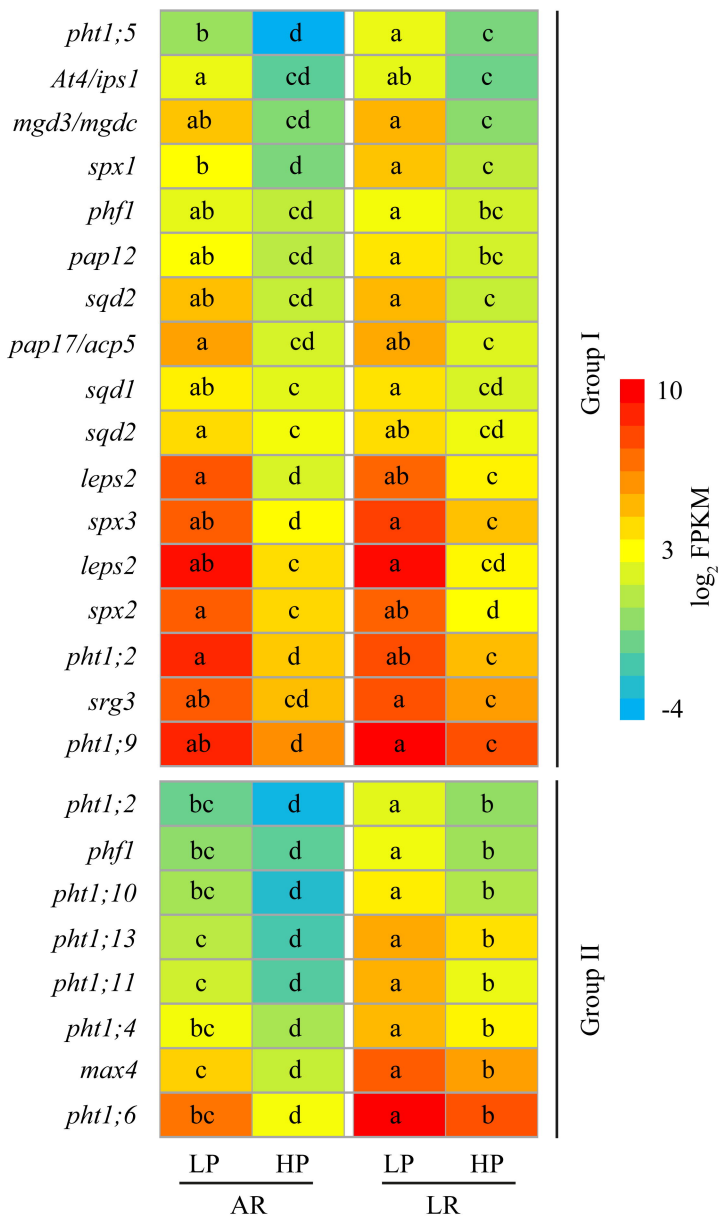



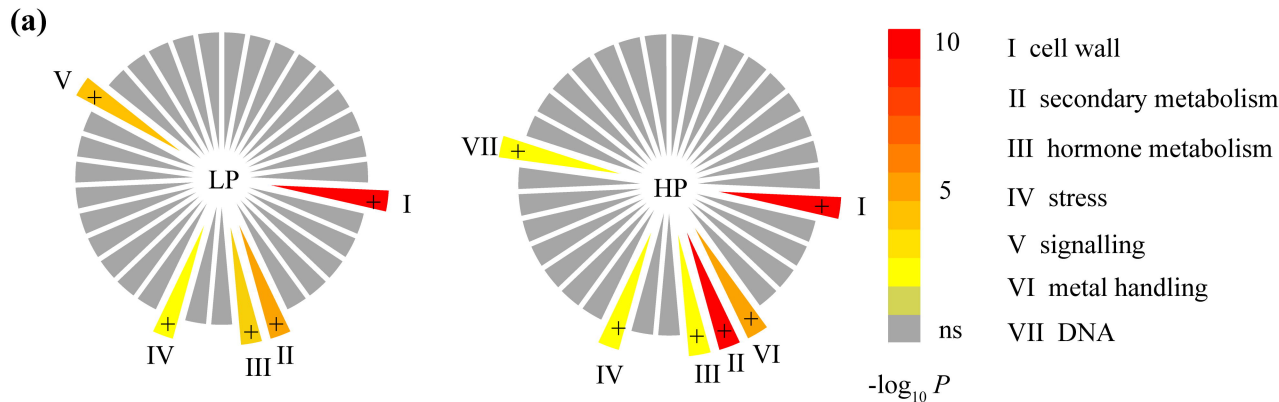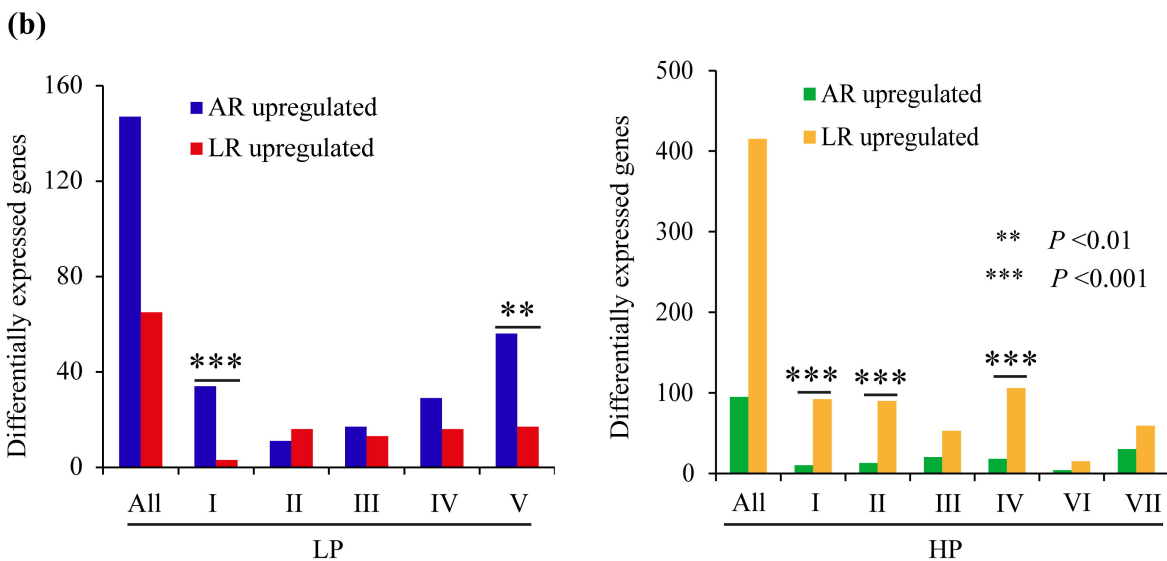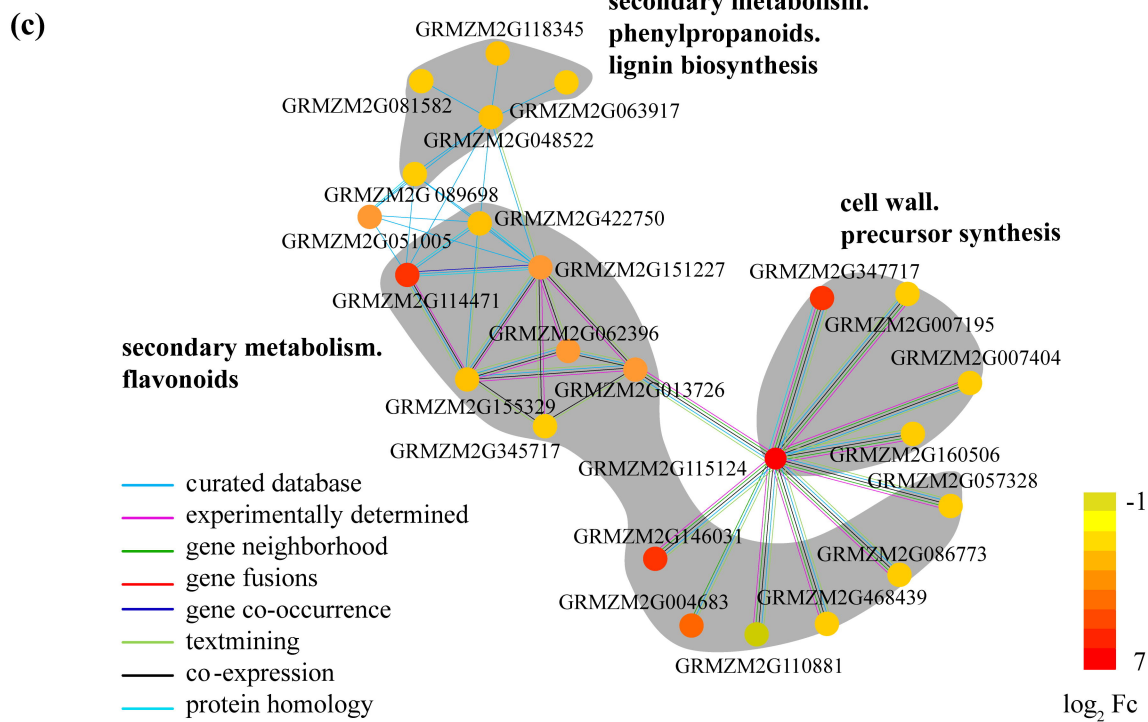

(a)

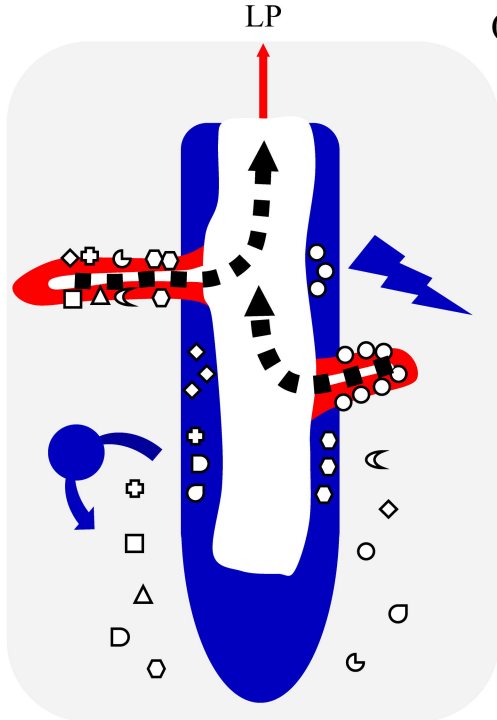

(b)

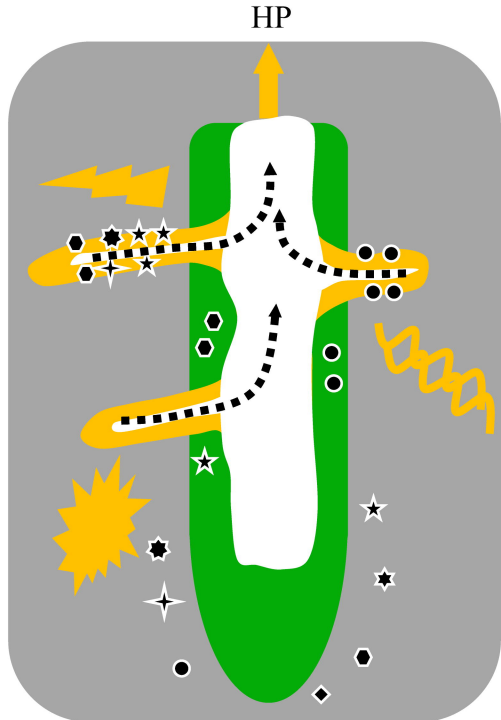

- |                       |                      |                     |
|-----------------------|----------------------|---------------------|
| LP-AR                 | Cell wall metabolism | AMF colonization    |
| LP-LR                 | Stress response      | Pleosporales        |
| HP-AR                 | Secondary metabolism | Agaricales          |
| HP-LR                 | Signaling            | Mortierellales      |
| Fungal uptake pathway |                      | Root uptake pathway |
